# Supplementary material for: Dihydrochalcone Derivatives from Populus balsamifera L. Buds for the Treatment of Psoriasis
Source: PubMed Central journal article supplement (PMC6981943; doi:10.3390/ijms21010256), 2019-12-30

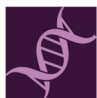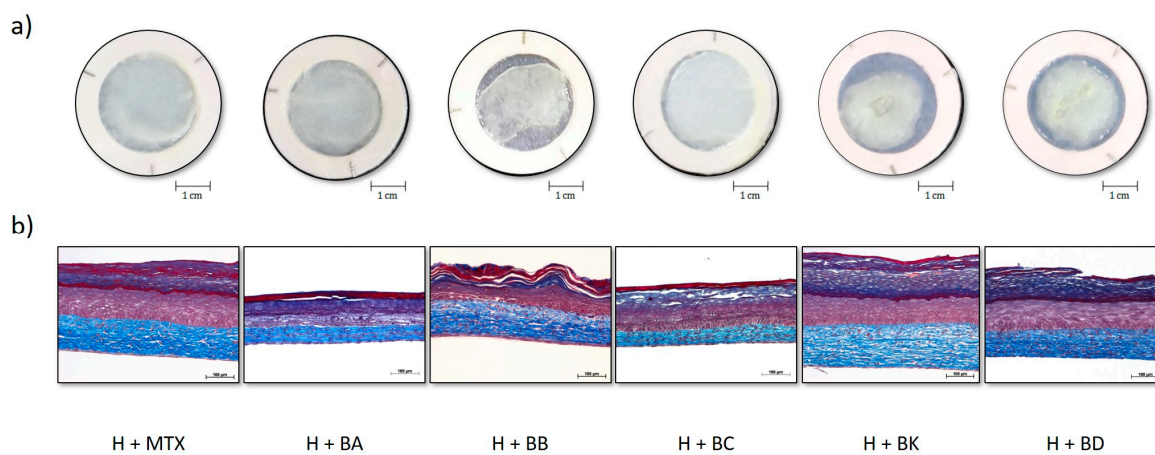

Supplement: ijms-21-00256-s001.pdf [file ijms-21-00256-s001.pdf]
